# Supplementary material for: Spectroscopic analyses of particle and energy aggregations at the interface of silver nanoparticles and fluorescent carbon nanodots
Source: Royal Society of Chemistry journal article supplement (doi:10.1039/d3nr01695a), 2023-01-01

Supporting Information

1     **Spectroscopic Analyses of Particle and Energy Aggregations at the Interface of**  
2                    **Silver Nanoparticles and Fluorescent Carbon Nanodots**

3 Yi-Shan Hung<sup>2#</sup>, Chia-Wen Chang<sup>3#</sup>, Yi Chen Shen<sup>2</sup>, Yun-Chi Yu<sup>2</sup>, Wei-Lun Huang<sup>2</sup>, Chia-Chi Huang<sup>1\*</sup>

4 <sup>1</sup> Departments of Chemistry, Tamkang University, No. 151, Yingzhuan Rd., Tamsui Dist., New Taipei  
5 City 25137, Taiwan

6 <sup>2</sup> Department of Applied Chemistry, National Chiayi University, No. 300, Syuefu Rd., Chiayi City 60004,  
7 Taiwan.

8 <sup>3</sup> Bachelor's Program in Advanced Materials Science, Tamkang University, No.151, Yingzhuan Rd.,  
9 Tamsui Dist., New Taipei City 25137, Taiwan

10 #Equal-share first authors.

11

12

13

14

15

16

17

18

19

20

21 \*Corresponding author's e-mail address: [cch@mail.tku.edu.tw](mailto:cch@mail.tku.edu.tw)

22

## 23 MATERIAL AND EXPERIMENT

### 24 *Materials*

25 Deionized ultrapure water (DI water) with a conductivity of 18.2 M $\Omega$ -cm was used in all experiments.  
26 Silver nitrate ( $\geq 99.0\%$ ) was purchased from Honeywell FLUKA. Sodium Citrate ( $\geq 99.0\%$ ) was  
27 bought from Shimakyu Pure Chemicals. Sodium borohydride (99.0%), thionyl chloride (97.0%),  
28 quinine hemisulfate salt monohydrate, and 2,2-Diphenyl-1-picrylhydrazyl (DPPH) were bought from  
29 Sigma-Aldrich. Glycine ( $\geq 99.0\%$ ) was purchased from VWR Life Science. 4-Aminophenyl disulfide  
30 ( $\geq 98.0\%$ ) was bought from Tokyo Chemical Industry Company. Alumina beads were bought from  
31 Hayashi pure chemical industry.

### 32 *Instrumentation*

33 Absorption spectra of the AgNPs solution were recorded on a U-1800 spectrophotometer (HITACHI,  
34 Japan). Transmission electron microscopy (TEM) images of AgNPs were recorded using a JEOL  
35 JEM2010 HRTEM system with an accelerating voltage of 200 KV (JEOL, Ltd., Japan). Field Emission  
36 Scanning Electron Microscope (FE-SEM) images of the beads were recorded using a JSM-6700F  
37 system with an accelerating voltage of 200 KV (JEOL, Ltd., Japan). Fluorescence spectra were  
38 acquired with a JASCO Spectrofluorometer FP-6500 and FT-IR with a Perkin Elmer Model Spectrum  
39 One instrument. Elemental analyses were made with an Elementar Vario EL cube machine. A  
40 microRaman system from HORIBA equipped with a 532nm laser (Shanghai DreamLasers Technology,  
41 SDL-532-1000T) at 5.0 mW power was employed for the study of SERS (conditions: integral times 1s,  
42 cycles 3). Room temperature for SERS measurements was controlled at 16°C.

### 43 *Preparation of silver nanoparticles*

44 Citrate-capped AgNPs (AgNPs<sup>C</sup>) was prepared by our previous method. Silver nitrate (27 mg) was  
45 dissolved in deionized water (150 mL) in a reflux system. Upon boiling, 1% (wt/vol) aqueous  
46 trisodium citrate solution (3 mL) was added to the silver ion solution. The reflux system was kept

## Supporting Information

47 at approximately 100°C in an oil bath for 1.5 h. Then, the Ag nanoparticle solution was cooled in an  
48 ice bath. The suspension of citrate-capped AgNPs was stored in a dark glass bottle at room  
49 temperature and used within a week. The morphology and UV-Vis spectrum of AgNPs<sup>C</sup> were shown  
50 in **Figure S1**.

51 Borohydride-reduced AgNPs (AgNPs<sup>B</sup>) was prepared by dropping ice-cooled 0.02 M aqueous solution  
52 of NaBH<sub>4</sub> to a stirred 0.01 M AgNO<sub>3</sub> solution (50 mL) at an approximate rate of 1 drop/second. When  
53 150 mL of the NaBH<sub>4</sub> solution has been consumed, the suspension of AgNPs<sup>B</sup> was ready and used  
54 within two hours. The morphology and UV-Vis spectrum of AgNPs<sup>B</sup> were shown in **Figure S2**.

### 55 ***Preparation of carbon nanodots (CDs)***

56 An aqueous solution of glycine (3 M, 30 mL) was placed in a 50-mL stainless bomb with Teflon liner.  
57 The bomb was sealed and heated in an oven for three hours at 230°C. After cooling to ambient  
58 temperature, the resultant solution was centrifuged at 1780 x g for ten minutes, and the supernatant  
59 was passed through a 0.22 µm-pore filter disc. The filtrate was dialyzed using a 1,000 D membrane  
60 and then lyophilized to give CDs<sup>Red</sup> as a pale-brown solid (493 mg, 7.3% yield).

61 CDs<sup>Red</sup> (10 mg/mL, 50 mL) and HNO<sub>3</sub> (65%, 25 mL) were placed in a 200-mL round bottom flask. The  
62 mixture was heated with stirring at 110°C for twenty-four hours and then evaporated under reduced  
63 pressure to give CDs<sup>Oxi</sup> as a yellow solid (650 mg, yield undetermined).

64 CDs<sup>Oxi</sup> (300 mg) and SOCl<sub>2</sub> (4 mL) were stirred and heated at 80°C for four hours. The mixture was  
65 evaporated under reduced pressure and the residue was heated with EtOH (15 mL) at 60°C for  
66 twenty-four hours. The resultant mixture was evaporated under reduced pressure to give CDs<sup>OEt</sup> as  
67 a brown solid (149 mg, yield undetermined).

### 68 ***Preparation of supported AgNPs<sup>C</sup> and AgNPs<sup>C</sup>-CDs***

69 AgNPs<sup>C</sup> suspension (0.4 mL) was diluted to 2.0 mL with H<sub>2</sub>O and then blended by a rotating motion

## Supporting Information

70 with ten alumina beads (average diameter = 7 mm) at room temperature for 3 hours. To make  
71 supported AgNPs<sup>C</sup>-CDs composites, AgNPs<sup>C</sup> suspension (0.4 mL) was mixed with CDs<sup>Red</sup>, CDs<sup>Oxi</sup>, or  
72 CDs<sup>OEt</sup> (4 mg/mL, 0.1 mL) and then diluted to 2.0 mL with H<sub>2</sub>O. Ten alumina beads were blended  
73 similarly with the desired suspension of AgNPs<sup>C</sup>-CDs at room temperature for 3 hours. These  
74 substrate-decorated beads were removed and air-dried for an hour before the next steps (SERS and  
75 SEM). One substrate-decorated bead was soaked in an ethanolic solution of 4-APDS (10<sup>-6</sup> M, 0.5  
76 mL) with agitation by a rotating motion at room temperature for 3 hours. The bead was removed  
77 and air-dried for an hour before SERS study.

### 78 ***Preparation of supported AgNP<sup>B</sup> and AgNPs<sup>B</sup>-CDs***

79 Freshly prepared suspension of AgNPs<sup>B</sup> (0.4 mL) was diluted to 2.0 mL with H<sub>2</sub>O. It was centrifuged  
80 at 1780 x g at room temperature for 15 minutes to remove any large particles due to premature  
81 aggregation. The supernatant (~1.9 mL) was removed and diluted to 2 mL with H<sub>2</sub>O. The resultant  
82 AgNPs<sup>B</sup> suspension was then used to prepare supported AgNPs<sup>B</sup> and AgNPs<sup>B</sup>-CDs for various studies  
83 following the same method as AgNPs<sup>C</sup>.

84

85 **Figure S1** – A typical UV-Vis spectrum and TEM image with size-distribution of AgNPs<sup>C</sup>

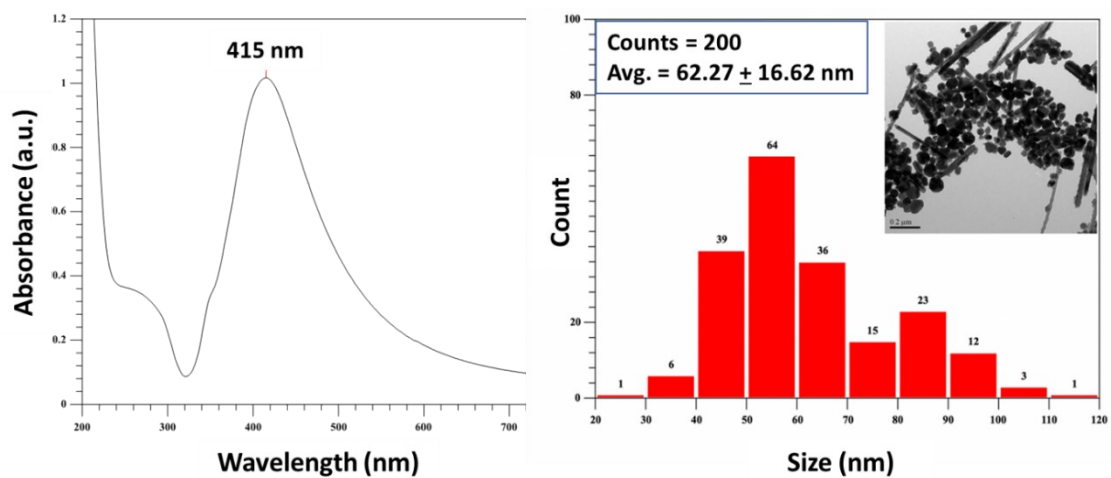

86

87 **Figure S2** – A typical UV-Vis spectrum and TEM image with size-distribution of AgNPs<sup>B</sup>

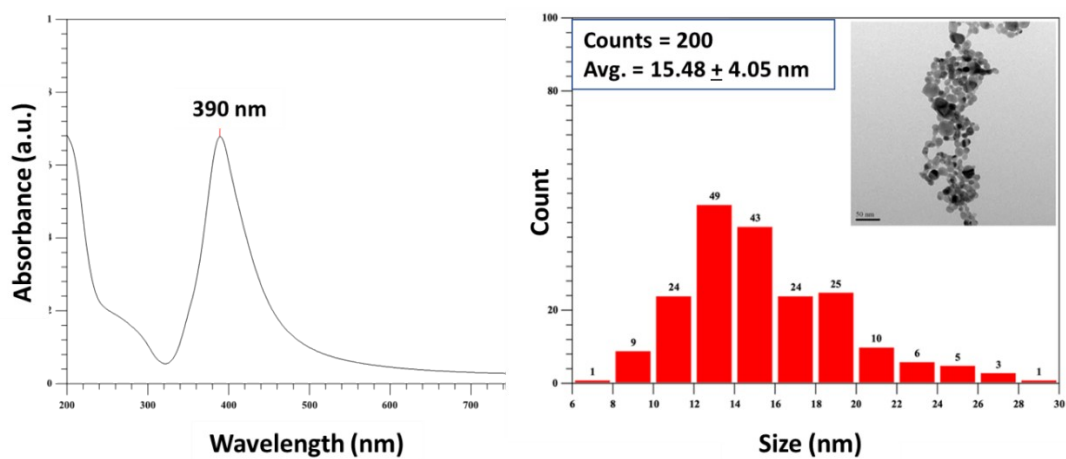

88

89

90 **Figure S3** – Raman spectra of CDs<sup>Red</sup> solid

91

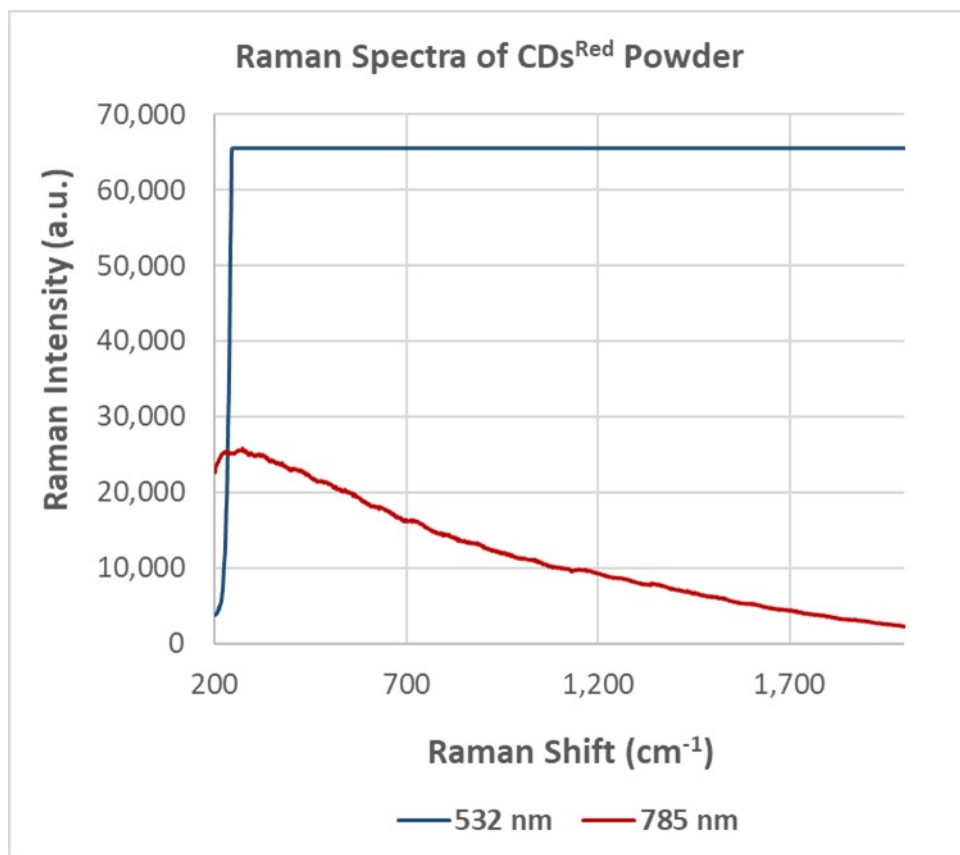

92

Supporting Information

93 **Figure S4** - TEM images of (A) AgNPs<sup>C</sup>; (B) AgNPs<sup>C</sup>-CDs<sup>Red</sup>; (C) AgNPs<sup>C</sup>-CDs<sup>Oxi</sup>; (D) AgNPs<sup>C</sup>-CDs<sup>OEt</sup>; (E)  
94 AgNPs<sup>B</sup>; (F) AgNPs<sup>B</sup>-CDs<sup>Red</sup>; (G) AgNPs<sup>B</sup>-CDs<sup>Oxi</sup>; (H) AgNPs<sup>B</sup>-CDs<sup>OEt</sup>

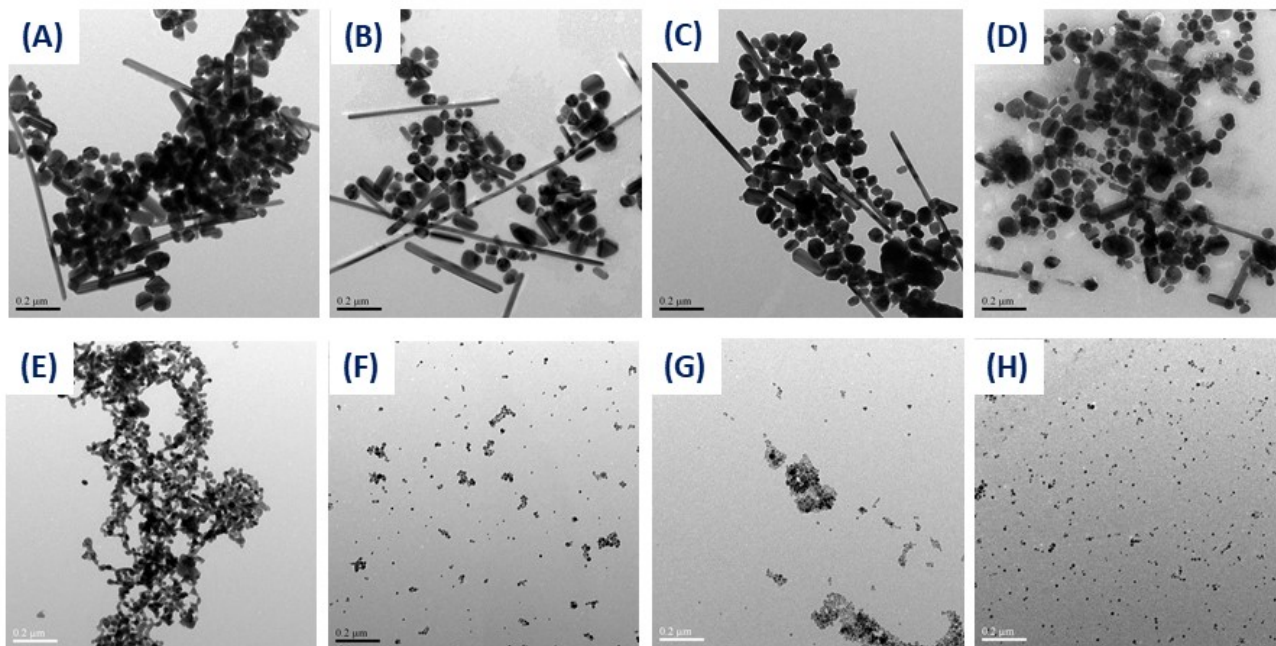

95

96

97

Supporting Information

98 **Figure S5** – Raman spectra of alumina-supported AgNPs<sup>B</sup> (A) and AgNPs<sup>B</sup>-CDs<sup>Red</sup> (B)

99

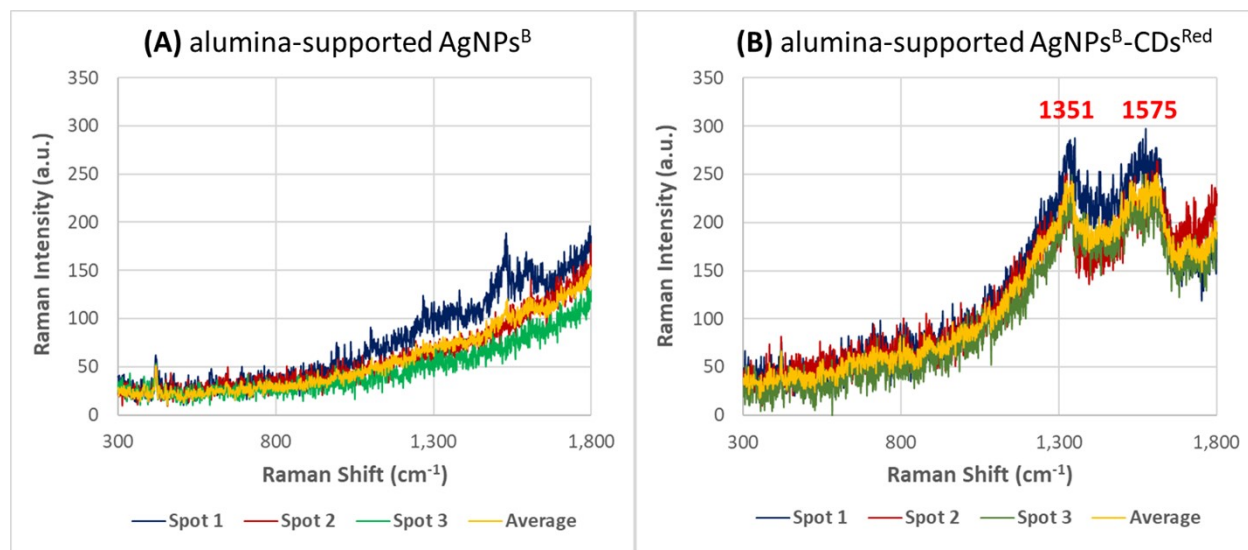



Supporting Information

101 **Figure S6** - SERS spectra of  $10^{-6}$  M 4-APDS measured at ten random spots on aluminum bead-  
102 supported (A) AgNPs<sup>C</sup>; (B) AgNPs<sup>C</sup>-CDs<sup>Red</sup>; (C) AgNPs<sup>B</sup>; (D) AgNPs<sup>B</sup>-CDs<sup>Red</sup>

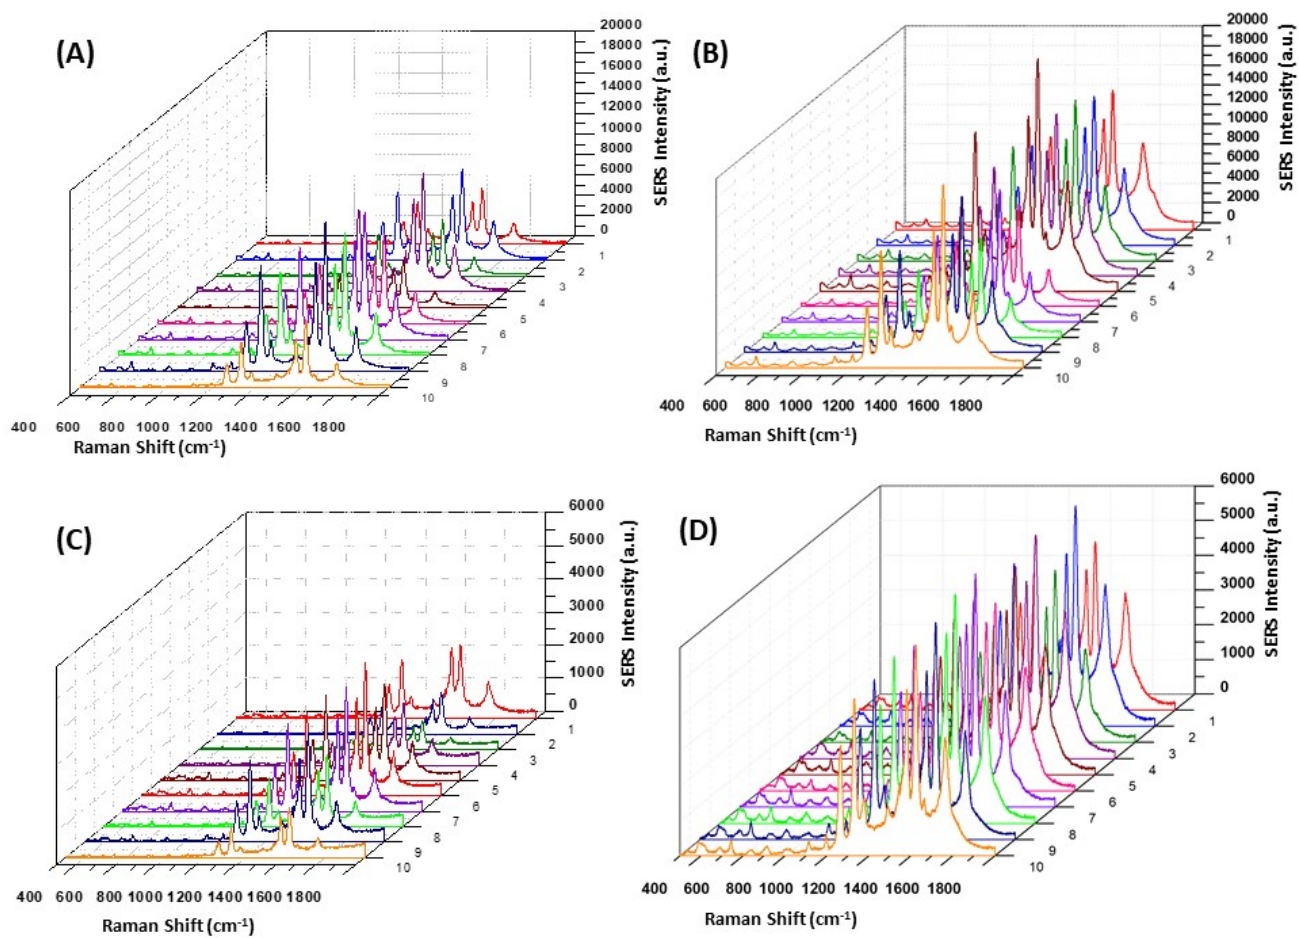

103

104

105 **Figure S7** – The TEM image of cysteine-derived carbon dots

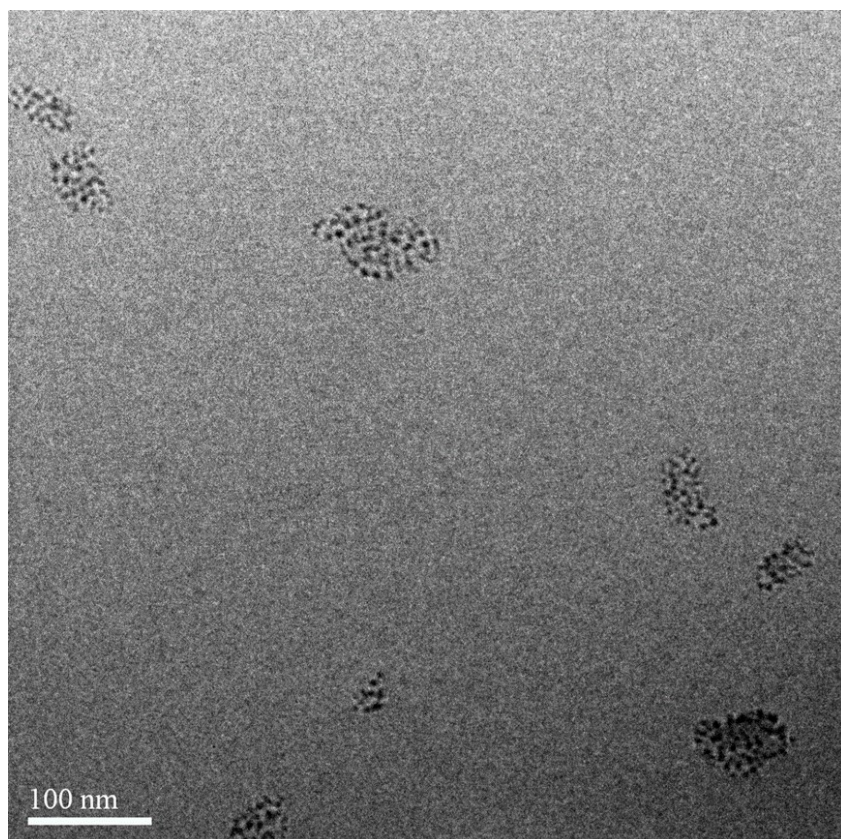

106

107

108 **Figure S8** – Unmarked version of **Figure 8C** and **8D**

109

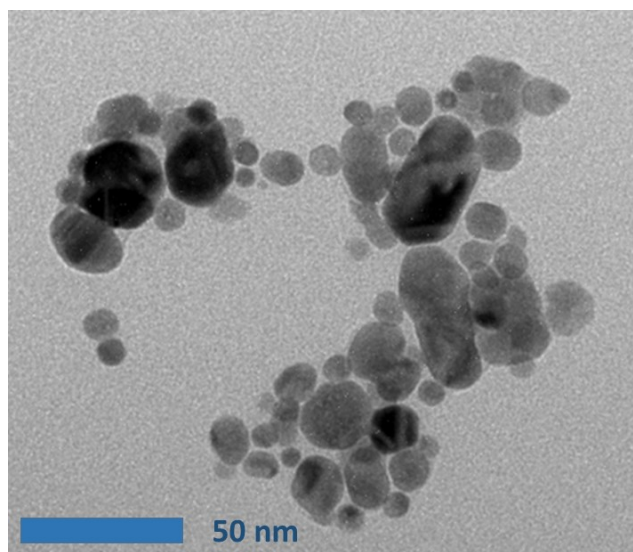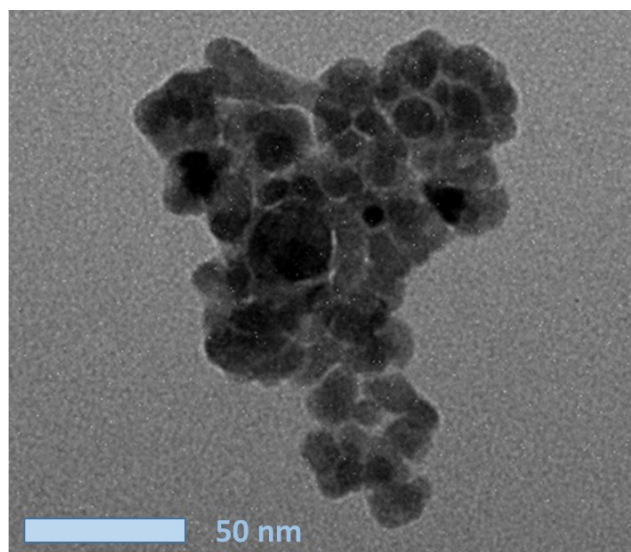

Supplement: d3nr01695a1.pdf [file d3nr01695a1.pdf]
